# Supplementary material for: Efficient Chlorostannate Modification of Magnetite Nanoparticles for Their Biofunctionalization
Source: MDPI journal article supplement (doi:10.3390/ma17020349), 2024-01-10
Supplement: s1 [file s1]

## Supplementary Materials

According to TEM microphotographs and calculations with Scherrer's equation (provided in original manuscript), crystallites sizes are about 12 nm. Agglomerates of MNP with sizes 50-100 nm are observed at SEM-microphotographs (Figure S1,a). The conducted EDX (Figure S1,b) confirmed that the synthesized citrate-stabilized MNP contain Fe, O and C, Na that have come from sodium citrate during MNP modification.

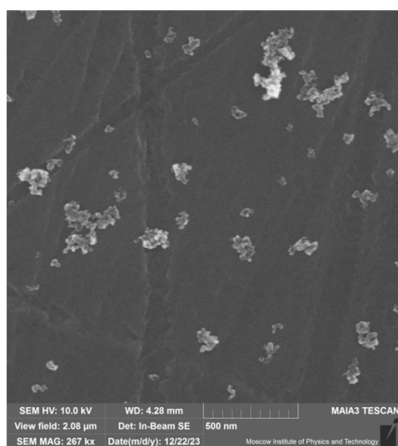

(a)

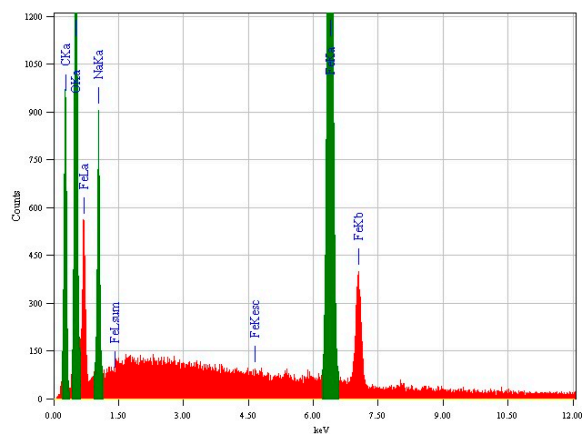

(b)

**Figure S1.** SEM-microphotographs of MNP-cit (a); EDX spectra of MNP-cit (b).
